# Supplementary material
Source: PubMed Central journal article supplement (PMC3443545)
Supplement: NIHMS372781-supplement-01.pdf [file NIHMS372781-supplement-01.pdf]

**Supplementary Table-1 | Cox proportional hazard model analysis of initial clinical and pathological variables on kidney failure in patients with IgAN**

|                                                        | HR   | 95%CI        | P value                | HR   | 95%CI       | P value               |
|--------------------------------------------------------|------|--------------|------------------------|------|-------------|-----------------------|
| Age (yr)                                               | 0.99 | (0.97,1.02)  | 0.76                   |      |             |                       |
| Gender                                                 | 0.68 | (0.36,1.28)  | 0.23                   |      |             |                       |
| Hemoglobin                                             | 1.01 | (0.99,1.03)  | 0.34                   |      |             |                       |
| Albumin                                                | 0.99 | (0.92,1.06)  | 0.67                   |      |             |                       |
| Hypertension (Yes/No)                                  | 0.67 | (0.36,1.24)  | 0.21                   | 1.07 | (0.54,2.13) | 0.84                  |
| Histological grading<br>(Mild lesions/ Severe lesions) | 4.35 | (1.83,10.33) | 0.001                  | 1.71 | (0.66,4.42) | 0.27                  |
| Proteinuria (g/d)                                      | 1.22 | (1.13,1.33)  | $1.57 \times 10^{-6}$  | 1.08 | (0.94,1.25) | 0.27                  |
| eGFR ( ml/min/1.73m <sup>2</sup> )                     | 0.58 | (0.50,0.68)  | $1.02 \times 10^{-12}$ | 0.97 | (0.96,0.98) | $3.79 \times 10^{-5}$ |
| Steroid use (Yes/No)                                   | 3.73 | (1.86,7.47)  | $2.09 \times 10^{-4}$  | 2.09 | (0.98,4.49) | 0.057                 |
| LnGd-IgA1                                              | 2.07 | (1.53,2.78)  | $1.68 \times 10^{-6}$  | 1.44 | (1.11-1.88) | 0.006                 |

Composite endpoint was defined as 50% decline of eGFR(n=29), ESRD(n=3) or death(n=2). The 2 deaths also had 50% decline of eGFR. Abbreviation: LnGd-IgA1, Natural Log-Transformed galactose-deficient IgA1. Hypertension and steroid use were analyzed as dichotomous data, histological grading and Gd-IgA1 quartiles as categorical data. Gd-IgA1 was analyzed as continuous data.
